# Supplementary material
Source: Springer Nature journal article supplement (https://www.springermedizin.de/resource/supplementary/12885_2011_2975_MOESM18_ESM.pdf/9462408)

**Leave-one-out Analysis using Tumor Tissue  
Gene Expression in Good-DFS Group**

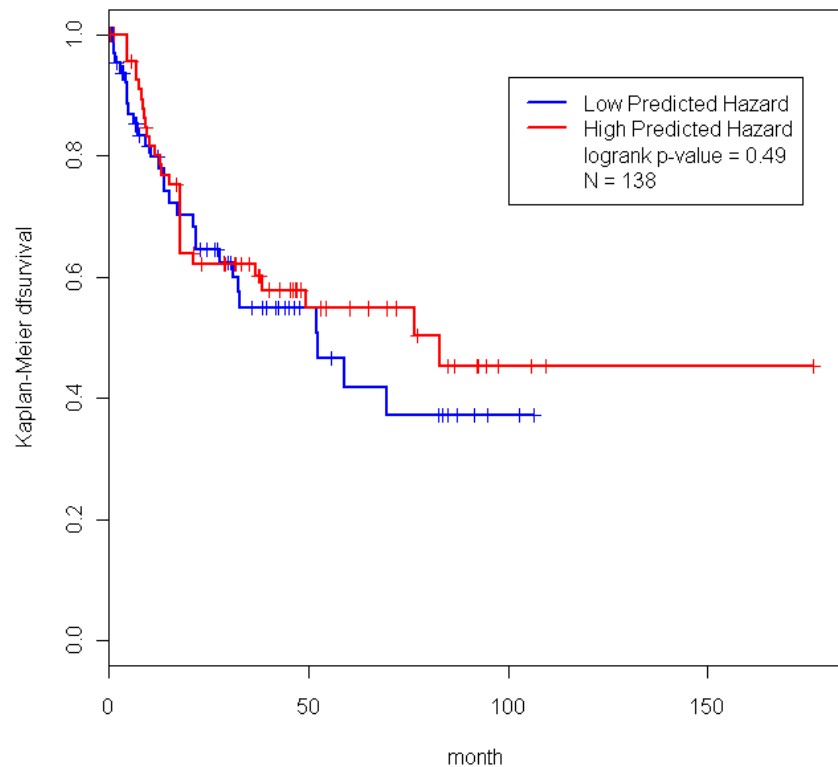

**Leave-one-out Analysis using Tumor Tissue  
Gene Expression in Poor-DFS Group**

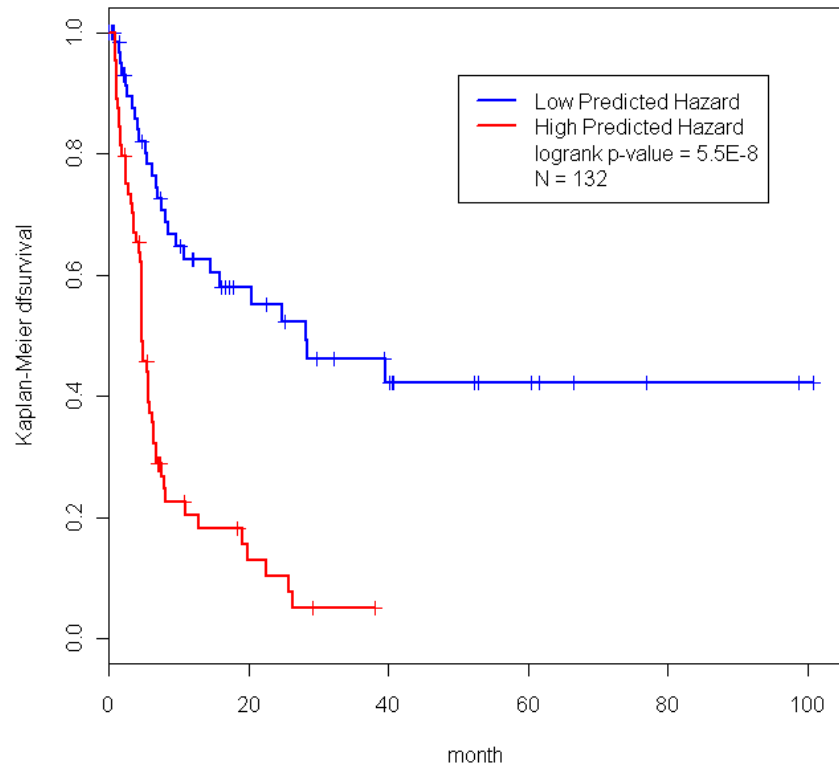

Supplement: MOESM18 [file 9462408]
